# Supplementary material
Source: Springer Nature journal article supplement (https://www.springermedizin.de/resource/supplementary/12911_2012_584_MOESM15_ESM.pdf/9525850)
Supplement: MOESM15 [file 9525850]

Variable Name

Range

Lower

Upper

## SSTAT-2

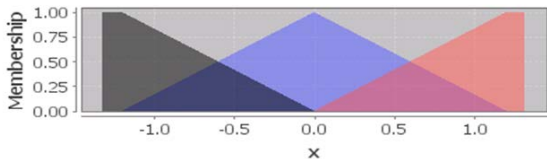

▲ Low ▲ High ▲ Med

Member Functions

Low  
Med  
High

Add

Remove

Auto-Define MFs

Copy MFs

Load MF Mappings

Member Function Parameters

Type

Name

Report Label

Mid

Max

Import

Export

Clear

Done

Cancel
